# Supplementary material
Source: publisher figshare collection journal article supplement (https://frontiersin.figshare.com/ndownloader/files/14167721)
Supplement: Supplementary file 1 [file 14167721]

## Sheet: 1_Lion Poisoning_Africa
	Recent Examples of Lion Poisoning
	Country	Year(s)	Source
	Uganda	2018	https://www.independent.co.uk/news/world/africa/uganda-lions-killed-poisoning-queen-elizabeth-national-park-wildlife-protection-investigation-a8302606.html
	Namibia	2016-2017	https://www.sciencealert.com/the-most-famous-lion-family-in-namibia-has-been-poisoned
			https://news.nationalgeographic.com/2016/08/wildlife-namibia-desert-lions-poisoned/
			http://www.dailymail.co.uk/news/article-4590886/Last-famous-lion-brothers-killed-Namibia.html
	Tanzania	2018	https://africa.cgtn.com/2018/06/05/nine-lions-poisoned-in-tanzania/
			https://observer.ug/lifestyle/57009-east-african-lions-dying-of-poisoning.html
	Kenya	2015	https://www.bbc.com/news/world-africa-35039571
			https://www.iflscience.com/plants-and-animals/poisoned-maasai-lions-reveal-wider-issue-heart-conservation/
	Mozambique	2016	https://africageographic.com/blog/lions-poisoned-for-bones-on-border-of-kruger/
	Botswana	2016	https://www.enca.com/life/poison-laced-meat-kills-120-vultures-in-northern-botswana
		2013-2018	Supplementary Figure 1
	West Africa	2014	https://blogs.scientificamerican.com/extinction-countdown/shocking-study-finds-lions-are-nearly-extinct-in-west-africa/

## Sheet: 2_Community respondents
	Respondent characteristics semi-structured interviews
	Participants characteristics	Cohort	Frequency
	Total		36
	Gender	Male	18
		Female	18
	Age class (years)	18-30	8
		31-45	9
		46-60	7
		>60	12
	Level of education	No schooling	15
		Junior level	13
		Cambridge	7
		Diploma	1
	Locality	Village	16
		Cattle post	20

## Sheet: 3_Codesign workshop particip
		Workshop participant characteristics				Workshop participant characteristics
	Workshop_1	Workshop_1	Workshop_1		Workshop_2	Workshop_2	Workshop_2
	Village	Group 1	Group 2		Village	Group 1	Group 2
	Time, Location	Role, gender, village/cattle post, age	Role, gender, village/cattle post, age		Time, Location	Role, gender, village/cattle post, age	Role, gender, village/cattle post, age
	Eretsha	Kgosi, M, Eretsha, 48	VDC Vice Chair, M, Eretsha, 40+		Eretsha	Kgosi, M, Eretsha, 48	Farmer, F, Katapa, 40+
	Group 1: 17/08, 9am	VDC Chair, M, Eretsha, 32	Farmer, F, Katapa, 40+		Group 1: 27/08, 2pm	Farmer, M, Kwaga, 24	Farmer, M, Miyagogo, 30+
	Group 2: 15/08, 9am	Farmer, F, Eretsha, 46 (Representing Farmers' Committee Chair)	Farmer, M, Miyagogo, 30+		Group 2: 27/08, 9am		Herder, M, Eretsha, 40+
	Kgotla area	Farmer, M, Twaimango, 21	Herder, M, Eretsha, 40+		Our camp		Farmer, M, Kachirachira, 30+
		Farmer, M, Kwaga, 24	Farmer, M, Kachirachira, 30+
		Farmer and Village Health Committee Chair, M, Eretsha, 30+	Farmer, M, Kwaga
	Beetsha	Kgosi, M, Beetsha, 50+	VDC Vice Chair, F, Beetsha, 40		Beetsha	VDC Chair, M, Beetsha, 30+	VDC Vice Chair, F, Beetsha, 40
	Group 1: 17/08, 2pm	VDC Chair, M, Beetsha, 30+	Farmer, M, Matswii 2, 52		Group 1: 29/08, 2pm	Farmer, M, Samogo, 30+	Farmer, M, Matswii 2, 52
	Group 2: 16/08, 9am	Farmers’ Committee Chair, M, Beetsha, 70+	Farmer, F, Zambia 2, 36		Group 2: 28/08, 9am	Farmer, F, Matswii 1, 40+	Farmer, F, Zambia 2, 36
	Kgotla area	Farmer, M, Samogo, 30+	Farmer, F, Beetsha, 41		Kgotla area	Farmer, F, Beetsha, 30+	Farmer, F, Beetsha, 41
		Farmer, F, Matswii 1, 40+	Farmer, M, Matswii 1, 29				Farmer, M, Matswii 1, 29
		Farmer, F, Beetsha, 30+	Farmer, M, Gomoteretere, 35				Farmer, M, Gomoteretere, 35
	Gunotsoga	Kgosi, M, Gunotsoga, 70	Farmer, M, Ndorotsha, 46		Gunotsoga	Kgosi, M, Gunotsoga, 70
	Group 1: 23/08, 9am	VDC Vice Chair, M, Gunotsoga, 76	Farmer, M, Gunotsoga, 80+		Group 1: 30/08, 9am	Junior Kgosi, M, Gunotsoga, 80+
	Group 2: 23/08, 2pm	Farmers’ Committee Chair, M, Gunotsoga, 53	Farmer, M, Samoti, 64 (Representing VDC Vice Chair)		Group 2: 30/08, 2pm	Farmer, M, Samoti, 35 (Representing VDC Chair)	Combined with Group 1
	Kgotla area	Farmer, M, Gunotsoga, 59	Farmer, M, Ndorotsha, 41		Kgotla area	Farmer, M, Gunotsoga, 65
		Farmer, M, Samoti, 35	Farmer, M, Gunotsoga, 65			Farmer, M, Gunotsoga, 59
		Farmer, M, Xau 2, 24	Farmer, M, Gunotsoga			Farmer, M, Gunotsoga, 80+

## Sheet: 4_Lion kills by month of year
	Lions Kills by Month of Year
	13 May 2016 - 12 May 2018
	Month of the year	No. of incidents	No. of livestock	Flood level
	January	27	28	low flood
	February	19	19	low flood
	March	17	18	rising flood
	April	6	6	high flood
	May	8	15	high flood
	June	19	27	high flood
	July	26	26	receding flood
	August	23	23	receding flood
	September	22	22	low flood
	October	42	49	low flood
	November	31	43	low flood
	December	14	18	low flood
	Total	255	291

## Sheet: 5_Lion_Alert_Recipients
	Lion Alert recipients
	Location	Cohort	Alerts received
	Beetsha	Beetsha	113
	Matswii 1 + 2	Beetsha	97
	Gomoteretere 1 + 2	Beetsha	111
	Nxeku	Beetsha	96
	Jungwe	Beetsha	80
	Teekae	Seronga	1
	Gudigwa	Gudigwa	50
	Tanijo	Gudigwa	96
	Eretsha	Eretsha	35
	Moyagogo	Eretsha	4
	Kwaga	Eretsha	12
	Kachirachira	Eretsha	31
	Katapa	Eretsha	8
	Samunyenge	Eretsha	12
	Gunotsoga	Gunotsoga	86
	Ndorotsha 1 + 2	Gunotsoga	91
	Samoti	Gunotsoga	75
	Xhau 1 + 2	Gunotsoga	9
	Senxanxa	Gunotsoga	10
	Total		1017

## Sheet: 6_Losses_Cattle_Alerts_Village
	Distribution of cattle numbers (2017), livestock losses to lions and lion alert messages received during the pilot study. Livestock holdings were sourced from the Ministry of Agriculture, Department of Veterinary Services office in Seronga.
	Village	No. of cattle	Percentage	Livestock loss to lions	Percentage	No. of lion alerts received	Percentage
	Beetsha	3445	31.1	52	17.9	497	48.9
	Eretsha	1300	11.8	35	12	102	10
	Gunotsoga	2171	19.6	156	53.6	271	26.6
	Gudigwa	2102	19	30	10.3	146	14.4
	Seronga	2051	18.5	18	6.2	1	0.1
	Total	11069	100	291	100	1017	100

## Sheet: 7_Satisfaction_Alerts
	Assessment	Column1	Column2	Column3
	Livestock Loss Compensation	Sample size (n)	Frequency	Percent of Sample
	No. of interviewees	65		100
	Received compensation before	65	37	56.92
	Satisfied with compensation	65	9	24.32
	Dissatisfied with compensation	37	28	75.68
	Reason 1 for dissatisfaction - Insufficient amount to replace losses	28	24	85.71
	Reason 2 for dissatisfaction - Delayed compensation payments	28	10	35.71
	No compensation claimed/received before	65	22	33.85
	Not answered	65	6	9.23
	Lion Alerts via SMS
	No. of interviewees	65		100
	Received alerts before	65	49	75.38
	No alerts received yet	65	16	24.62
	Wish to continue to receive or start receiving alerts in the future	65	59	90.77
	Previous recpient: Alerts are beneficial	49	45	91.84
	Previous recipient: Alerts are not beneficial	49	4	8.16
	Previous recipient: Do not wish to receive any more alerts in the future	49	3	6.12

## Sheet: 8_GPS_days_complete
	Lion GPS fixes 2016-2018
	Individual	Collar brand	Scheduled fixes (day)	Tracking days	Complete data received	Percent		All units	Value
	PleoF001	Telonics	5	223	200	92.59		n	13
	PleoF003	Telonics	5	223	165	73.99		Mean	27.9
	PleoM005	Telonics	5	218	119	52.19		SE	7.72
	PleoM006	Telonics	5	218	5	2.29		SD	26.74
	Subtotal	Telonics	5	875	489	55.89		Median	18.18
	PleoF001	Vectronic	12	513	105	20.47		Min	2.29
	PleoF003	Vectronic	12	506	67	13.24		Max	92.59
	PleoF004	Vectronic	12	117	14	11.97
	PleoF005	Vectronic	12	511	97	18.98
	PleoM001	Vectronic	12	71	8	11.27
	PleoM005	Vectronic	12	70	6	8.57
	PleoM006	Vectronic	12	160	49	30.63
	PleoM009	Vectronic	12	96	8	8.33
	PleoM010	Vectronic	12	22	4	18.18
	Subtotal	Vectronic	12	2066	358	17.33
	All Units			2941	847	28.8

## Sheet: 9_GPS fixes received per lion
	Lion GPS fixes 2016-2018
		Unit_1	Unit_1	Unit_1	Unit_2	Unit_2	Unit_2	Total	Total	Total		Total % per Lion	Value
	Individual	Expected	Received	Percent	Expected	Received	Percent	Expected	Received	Percent		n	9
	PleoF001	1085	1038	95.67	6159	5288	84.88	7244	6326	87.33		Mean	81.2
	PleoF003	1119	1073	95.89	6077	4989	82.1	7196	6062	84.24		SE	1.61
	PleoF004	n/a	n/a	n/a	1413	1113	78.77	1413	1113	78.77		SD	4.54
	PleoF005	n/a	n/a	n/a	6132	5097	83.12	6132	5097	83.12		Median	82.25
	Females	2204	2111	95.78	19781	16427	83.04	21985	18538	84.32		Min	74.76
	PleoM001	n/a	n/a	n/a	875	684	78.17	875	684	78.17		Max	87.33
	PleoM005	1520	1075	70.72	852	701	82.28	2372	1776	74.87
	PleoM006	1152	588	51.05	1934	1719	88.88	3086	2307	74.76
	PleoM009	n/a	n/a	n/a	1166	959	82.25	1166	959	82.25
	PleoM010	n/a	n/a	n/a	276	241	87.32	276	241	87.32
	Males	2672	1663	62.24	4952	4455	89.96	7624	6118	80.25
	All Units (n=13)	4876	3774	77.4	24733	20882	84.43	29609	24656	83.27

## Sheet: 10_Conflict_Variables
		Factors influencing conflict likelihood in the northern Okavango Delta
No.	Category	Variable	Rationale	Literature/Supporting evidence
1	Lion	Vicinity of core home range to potential conflict areas	more likely to interact with cattle if home range is located close to community areas - females may seek breeding refuge in community areas to avoid areas with high male overturn (risk of infanticide)	Snyman et al. 2018; this study
2	Lion	ID	different individuals may be more prone to kill livestock (habitual raiders), solitary older animals more likely to choose easy prey	Stander 1990; Snyman et al. 2018; this study
3	Lion	Age	lion movements vary with dispersal stage influencing likelihood of encountering livestock - dispersing lions move faster and farther	Elliot et al. 2014
4	Lion	Behaviour	lion movements (speed and direction) differ by behavioural and physiological states (e.g. rest, hunt, home range patrol)	Ongava Research Centre studies (Namibia); Valeix et al. 2012
5	Lion	Time since last kill	lions likely to be more conflict-prone as time from last meal increases	Bothma & Le Riche 1990
6	Lion	Group composition	energy requirements related to group size and prey capture success rates	van Orsdol 1984; Stander 1992; Stander & Albon 1993; Loveridge et al. 2009
7	Lion	Presence of cubs	females are energy-stressed during cub rearing (e.g. costs of lactation)	Schaller 1972; Oftedal 1984; Clutton-Brock et al. 1989; Oftedal & Gittleman 1989
8	Lion	Historic location-specific behaviour	lions exhibit stereotypical patterns of landscape use	Valeix et al. 2011
9	Cattle	Herd size	bigger herds are easier to detect in the landscape, whereas individual predation risk probability decreases	van Orsdol 1984
10	Cattle	Body mass	middle of the preferred prey weight range - likely to be preferentially preyed upon	Hayward & Kerley 2005; Hayward et al. 2007; Owen-Smith & Mills 2008; Hayward et al. 2011
11	Cattle	Presence of herder/guard dog	active protection vs. no protection	Ogada et al. 2003; Kuiper et al. 2015; Mkonyi et al. 2017
12	Cattle	Kraaling/Corraling	protection during night hours vs. free-roaming when lions are most active	Valeix et al. 2012; Lichtenfeld et al. 2015; Loveridge et al. 2017; Sutton et al. 2017; Weise et al. 2018
13	Cattle	Cattle distance from 'home'	more likely to interact with lions further away from 'home'	Valeix et al. 2012; Kuiper et al. 2015; Weise et al. 2019
14	Cattle	Cattle breed/race	traditional cattle races retain protective instincts and horns (active anti-predatory response)
15	Environment	Time of day	lions being crepuscular, predominantly hunt at night	Schaller 1972; this study
16	Environment	Surface water availability and flooding levels	surface water influences cattle, prey & lion movements and ecology	Davidson et al. 2013; Kotze et al. 2018; Weise et al. 2019; this study
17	Environment	Habitat (macro)	conflict is pronounced in specific vegetation classes due to cattle grazing	Davidson et al. 2012; Weise et al. 2019
18	Environment	Habitat (micro)	proximity to cover for stalking and ambush	van Orsdol 1984; Loarie et al. 2013; Davies et al. 2016
19	Environment	Season	seasonality of lion and cattle movements determines conflict intensity	Tumenta et al. 2013; this study
20	Environment	Zebra (main prey) movements	mainstay prey moving seasonally influencing lion movements	Schaller 1972; Stander 1990
21	Environment	Wild prey abundance	prefer wild prey over livestock if the relative abundances/availability of both are considered	Valeix et al. 2012; Tumenta et al. 2013; Bauer et al. 2014; Winterbach et al. 2014
22	Environment	Moon phase	lion hunting success rate and activity differs with lunar cycle	van Orsdol 1984; Stander & Albon 1993; Funston et al. 2001; Davies et al. 2016; Palmer et al. 2017
23	Environment	Surface water retraction	during dry season receeding flood waters create last wet patches with high quality grass growth (last food available to grazers)	Sianga et al. 2017; Weise et al. 2019
24	Environment	Rainfall	drought forces cattle closer to lions (mediated via access to available water) or vice versa - interaction and conflict likelihoods increase	Celesia et al. 2009; Tuqa et al. 2014
25	Environment	Periodic flooding of ecosystem	extent of flooding either prohibits (high flood) or facilitates (low flood) lion movements	Tumenta et al. 2013; Tuqa et al. 2014; Kotze et al. 2018; this study
26	Environment	Human activity	lions tend to avoid risky areas as defined by anthropogenic acitvities	Valeix et al. 2012; Loveridge et al. 2016; Snyman et al. 2018
				References
				Funston, P.J., Mills, M.G.L. & Biggs, H.C. 2001. Factors affecting the hunting success of male and female lions in the Kruger National Park. Journal of Zoology, 253, 419-431.
				Mkonyi, F.J., Estes, A.B., Msuha, M.J., Lichtenfeld, L.L. & Durant, S.M. 2017. Fortified Bomas and Vigilant Herding are Perceived to Reduce Livestock Depredation by Large Carnivores in the Tarangire-Simanjiro Ecosystem, Tanzania. 1-11.
				Ogada, M., Woodroffe, R., Oguge, N. & Frank, L.G. 2003. Limiting depredation by African carnivores: the role of livestock husbandry. Conservation Biology, 17, 1521-1530.
				Valeix, M., Hemson, G., Loveridge, A.J., Mills, M.G.L. & Macdonald, D.W. 2012. Behavioural adjustments of a large carnivore to access secondary prey in a human-dominated landscape. Journal of Applied Ecology, 49, 73-81.
				Weise, F.J., Hayward, M.W., Casillas Aguirre, R., Tomeletso, M., Gadimang, P., Somers, M.J. & Stein, A.B. 2018. Size, Shape and Maintenance Matter: A critical appraisal of a global carnivore conflict mitigation strategy – livestock protection kraals in northern Botswana. Biological Conservation, 255, 88-97.
				Sutton, A.E., Downey, M.G., Kamande, E., Munyao, F., Rinaldi, M., Taylor, A.K. & Pimm, S. 2017. Boma fortification is cost-effective at reducing predation of livestock in a high-predation zone in the Western Mara region, Kenya. Conservation Evidence 14, 32-38.
				Sianga, K. & Fynn, R. 2017. The vegetation and wildlife habitats of the Savuti-Mababe-Linyanti ecosystem, northern Botswana. Koedoe, 59, 1-16.
				Loveridge, A.J., Kuiper, T., Parry, R.H., Sibanda, L., Hunt, J.E., Stapelkamp, B., Sebele, L. & Macdonald, D.W. 2017. Bells, bomas and beefsteak: complex patterns of human-predator conflict at the wildlife-agropastoral interface in Zimbabwe. PeerJ, 5, e2898.
				Lichtenfeld, L.L., Trout, C. & Kisimir, E.L. 2015. Evidence-based conservation: predator-proof bomas protect livestock and lions. Biodiversity and Conservation, 24, 483-491.
				Kuiper, T., Loveridge, A.J., Parker, D., Hunt, J.E., Stapelkamp, B., Sibanda, L. & Macdonald, D.W. 2015. Seasonal herding practices influence predation on domestic stock by African lions along a protected area boundary. Biological Conservation, 191, 546–554.
				Davidson, Z., Valeix, M., Loveridge, A.J., Hunt, J.E., Johnson, P.J., Madzikanda, H. & Macdonald, D.W. 2012. Environmental determinants of habitat and kill site selection in a large carnivore: scale matters. Journal of Mammalogy, 93, 677-685.
				Stander, P.E., 1990. A suggested management strategy for stock-raiding lions in Namibia. South African Journal of Wildlife Research, 20, 37-43.
				Schaller, G.B. 1972. The Serengeti Lion: A study of predator-prey relations. University of Chicago Press, Chicago, USA.
				Valeix, M., Chamaillé-Jammes, S., Loveridge, A.J., Davidson, Z., Hunt, J.E., Madzikanda, H. & Macdonald, D.W. 2011. Understanding Patch Departure Rules for Large Carnivores: Lion Movements Support a Patch-Disturbance Hypothesis. The American Naturalist, 178, 269-275.
				Bothma, J. du P. & Le Riche, E.A.N., 1990. The influence of increasing hunger on the hunting behaviour of southern Kalahari leopards. Journal of Arid Environments, 18, 79–84.
				Palmer, M.S., Fieberg, J., Swanson, A., Kosmala, M. & Packer, C. 2017. A 'dynamic' landscape of fear: prey responses to spatiotemporal variations in predation risk across the lunar cycle. Ecology Letters, 20, 1364-1373.
				Hulbert, I.A.R. & French, J. 2001. The accuracy of GPS for wildlife telemetry and habitat mapping. Journal of Applied Ecology, 38, 869-878.
				Kays, R., Crofoot, M.C., Jetz, W. & Wikelski, M. 2015. Terrestrial Animal Tracking as an eye on life and planet. Science, 348, 1222-1231.
				Tumenta, P.N., van't Zelfde, M., Croes, B.M., Buij, R., Funston, P.J., de Haes, H.A.U. & de Iongh, H. 2013. Changes in lion (Panthera leo) home range size in Waza National Park, Cameroon. Mammalian Biology, 78, 461-469.
				Bauer, D., Schiess-Meier, M., Mills, D.R. & Gusset, M. 2014. Using spoor and prey counts to determine temporal and spatial variation in lion (Panthera leo) density. Canadian Journal of Zoology, 92, 97-104.
				Hayward, M.W. & Kerley, G.I.H. 2005. Prey preferences of the lion (Panthera leo). Journal of Zoology, 267, 309-322.
				Hayward, M.W., Hayward, G.J., Tambling, C.J. & Kerley, G.I.H. 2011. Do Lions Panthera leo Actively Select Prey or Do Prey Preferences Simply Reflect Chance Responses via Evolutionary Adaptations to Optimal Foraging? PLoS ONE, 6, e23607.
				Hayward, M.W., Hofmeyr, M., O'Brien, J. & Kerley, G.I.H. 2007. Testing predictions of the prey of the lion (Panthera leo) derived from modelled prey preferences. Journal of Wildlife Management, 71, 1567–1575.
				Loveridge, A.J., Valeix, M., Davidson, Z., Murindagomo, F., Fritz, H. & Macdonald, D.W. 2009. Changes in home range size of African lions in relation to pride size and prey biomass in a semi-arid savanna. Ecosphere, 32, 953-962.
				Tuqa, J.H., Funston, P., Musyoki, C., Ojwang, G.O., Gichuki, N.N., Bauer, H., Tamis, W., Dolrenry, S., Van't Zwelfde, M., de Snoo, G.R. & de Iongh, H.H. 2014. Impact of severe climatic variability on lion home range and movement patterns in the Amboseli ecosystem, Kenya. Global Ecology and Conservation, 2, 1-10.
				Celesia, G., Townsend Peterson, A., Kerbis, J. & Gnoske, T.P. 2009. Climate and landscape correlates of African lion (Panthera leo) demography. African Journal of Ecology, 48, 58-71.
				Sianga, K., Fynn, R.W.S. & Bonyongo, M.C. 2017. Seasonal habitat selection by African buffalo Syncerus caffer in the Savuti-Mababe-Linyanti ecosystem of Northern Botswana. Koedoe, 59, DOI: 10.4102/koedoe.v59i2.1382.
				Loveridge, A.J., Valeix, M., Chapron, G., Davidson, Z., Mtare, G. & Macdonald, D.W. 2016. Conservation of large predator populations: Demographic and spatial responses of African lions to the intensity of trophy hunting. Biological Conservation, 204, 247-254.
				Davies, A.B., Tambling, C.J., Kerley, G.I.H. & Asner, G.P. 2016. Effects of Vegetation Structure on the Location of Lion Kill Sites in African Thicket.PLoS ONE, 11, e0149098.
				Stander, P.E. 1992. Foraging dynamics of lions in a semi-arid environment. Canadian Journal of Zoology, 70, 8-21.
				van Orsdol, KG. 1984. Foraging behaviour and hunting success of lions in Queen Elizabeth National Park, Uganda. African Journal of Ecology, 22, 79-99.
				Davidson, Z., Valeix, M., Van Kesteren, F., Loveridge, A.J., Hunt, J.E., Murindagomo, F. & Macdonald, D.W. 2013. Seasonal Diet and Prey Preference of the African Lion in a Waterhole-Driven Semi-Arid Savanna. PLoS ONE, 8, e55182.
				Owen-Smith, N. & Mills M.G.L. 2008. Predator–prey size relationships in an African large‐mammal food web. Journal of Animal Ecology, 77, 173-183.
				Snyman, A., Raynor, E., Chizinski, C., Powell, L. & Carroll, J. 2018. African Lion (Panthera leo) Space Use in the Greater Mapungubwe Transfrontier Conservation Area. African Journal of Wildlife Research, 48, 1-12.
				Elliot, N.B., Cushman, S.A., Loveridge, A.J., Mtare, G. & Macdonald, D.W. 2014. Movements vary according to dispersal stage, group size, and rainfall: The case of the African lion. Ecology, 95, 2860-2869.
				Oftedal, O.T. 1984. Milk composition, milk yield and energy output at peak lactation: a comparative review. Symposium of the Zoological Society of London, 51, 33–85.
				Clutton-Brock, T.H., Albon, S.D. & Guinness, F.E. 1989. Fitness costs of gestation and lactation in wild mammals. Nature, 337, 260–262.
				Oftedal, O.T. & Gittleman, J.L. 1989. Patterns of energy output during reproduction in carnivores. In: “Carnivore Behavior, Ecology, and Evolution." (J.L. Gittleman, ed.) pp. 355-379, Cornell University Press, Itheca, NY.
				Weise, F.J., Fynn, R.W.S., Stein, A.B., Tomeletso, M., Somers, M.J. & Periquet, S. 2019. Can beef and beast coexist? Implications of seasonal cattle habitat selection for conflict with lions in the northern Okavango Delta. Submitted to Biological Conservation.
				Stander, P.E. & Albon, S.D. 1993. Hunting success of lions in a semi-arid environment. Zoological Symposium, 65, 127-143.
				Kotze, R., Keith, M., Winterbach, C.W., Winterbach, H.E.K. & Marshal, J.P. 2018. The influence of social and environmental factors on organization of African lion (Panthera leo) prides in the Okavango Delta. Journal of Mammalogy, XX, 1-14.
				Winterbach, H.E.K., Winterbach, C.W. & Somers, M.J. 2014. Landscape Suitability in Botswana for the Conservation of Its Six Large African Carnivores. PLoS ONE, 9, e100202. doi:10.1371/journal.pone.0100202
				Loarie, S.R., Tambling, C.J. & Asner, G.P. 2013. Lion hunting behaviour and vegetation structure in an African savanna. Animal Behaviour, 85, 899-906.
